# Supplementary material for: Modulation of an intermediate layer between NiCoP and Ni foam substrate in a microwire array electrode for enhancing the hydrogen-evolution reaction
Source: Royal Society of Chemistry journal article supplement (doi:10.1039/d0cc01488e), 2020-01-01
Supplement: d0cc01488e1.pdf [file d0cc01488e1.pdf]

## Supplementary Information

### Intermediate Layer Modulation between NiCoP and Ni Foam Substrate in Microwire Array Electrode for Enhanced Hydrogen Evolution Reaction

Dan Guo,<sup>#a</sup> Huayu Chen,<sup>#b,c</sup> Hanmin Tian,<sup>\*a</sup> Shuxin Ouyang,<sup>\*d</sup> Jianbo Wang<sup>e,g</sup> and Jun Lv<sup>\*f,g</sup>

<sup>a</sup> School of Electronics and Information Engineering, Hebei University of Technology, Tianjin 300400, P. R. China

<sup>b</sup> College of Materials and Chemistry, China Jiliang University, Hangzhou 310018, P. R. China.

<sup>c</sup> TJU-NIMS International Collaboration Laboratory, School of Materials Science and Engineering, Tianjin University, Tianjin 300072, P. R. China

<sup>d</sup> College of Chemistry, Central China Normal University, Wuhan 430079, P. R. China

<sup>e</sup> School of Electronic Science & Engineering, Southeast University, Nanjing 210096, P. R. China

<sup>f</sup> Electronic Information Engineering College, Sanjiang University, Nanjing 210012, P. R. China

<sup>g</sup> LONGi Solar Technology Co., Ltd., Xi'an 710018, P. R. China

<sup>#</sup> These authors contributed equally to this work.

<sup>\*</sup> Author to whom correspondence should be addressed.

Email: [tianhanmin@hebut.edu.cn](mailto:tianhanmin@hebut.edu.cn); [oysx@mail.ccnu.edu.cn](mailto:oysx@mail.ccnu.edu.cn); [solar\\_lv@163.com](mailto:solar_lv@163.com)

## Experimental Section

*Preparation of CoCH/NF and CoMoCH/NF Microwire Array Electrodes:* The  $\text{Co}(\text{NO}_3)_2 \cdot 6\text{H}_2\text{O}$  (0.582 g),  $\text{NH}_4\text{F}$  (0.186 g) and urea (0.60 g) were dissolved in 40 ml distilled water and stirred for 30 min to form a clear solution. In regard to the additive of  $\text{NH}_4\text{F}$ , the  $\text{F}^-$  ion can modulate the growth of crystal face, and  $\text{NH}_4^+$  acts as complexing agent to modulate the polarity of solution and further affects mass transfer. A piece of Ni foam ( $2\text{ cm} \times 3\text{ cm}$ ) as the substrate was pretreated by alternatively stirred in 1 M  $\text{H}_2\text{SO}_4$  aqueous solution and distilled water to remove the surface oxide. Subsequently the above mixed solution as well as the Ni foam substrate was transferred to a 50 ml Teflon-lined stainless steel autoclave and held at  $120\text{ }^\circ\text{C}$  for 6 h to deposit microwire array on the surface of Ni foam. After cooled down to room temperature, a piece of Ni foam coated with purple powder (denoted as CoCH/NF) was obtained. This CoCH/NF sample was washed by distilled water for several times and dried in vacuum.

For the preparation of CoMoCH/NF, the as-prepared CoCH/NF was immersed into a  $\text{Na}_2\text{MoO}_4 \cdot 2\text{H}_2\text{O}$  aqueous solution (0.2 g dissolved in 35 ml distilled water) and then transferred to the 50 ml Teflon-lined stainless steel autoclave. After maintained at  $120\text{ }^\circ\text{C}$  for 6 h, the CoMoCH/NF with darker color was obtained.

*Preparation of CoCH@NiCoP/NF and CoMoCH@NiCoP/NF Microwire Array Electrodes:* The electrodepositions of NiCoP on the surfaces of CoCH/NF and CoMoCH/NF microwire array were operated by the electrochemical station (CHI 660E) in a three-electrode configuration. The electrolyte comprised of  $\text{NH}_4\text{Cl}$  (0.25 M),  $\text{NaH}_2\text{PO}_4 \cdot \text{H}_2\text{O}$  (0.20 M),  $\text{NiCl}_2 \cdot 6\text{H}_2\text{O}$  (0.20 M) and  $\text{CoCl}_2 \cdot 6\text{H}_2\text{O}$  (0.20 M). The CoCH/NF (or CoMoCH/NF) was used as the work electrode, a Pt wire electrode was used as the counter electrode, and an Ag/AgCl (3 M KCl) electrode was used as the reference electrode. The CoCH/NF (or CoMoCH/NF) electrode was applied constant current of 30 mA for 40 min to finally form the CoCH@NiCoP/NF (or CoMoCH@NiCoP/NF) electrode. The mass loading of catalyst was about  $3\text{ mg cm}^{-2}$ .

*Characterizations:* X-ray diffraction (XRD) patterns were measured by X-ray diffractometer (D8 Advanced, Bruker, Germany). The morphologies of the samples were observed by the transmission electron microscope (Jem-2100F, Jeol, Japan) and scanning electron microscope (S4800, Hitachi, Japan). The Brunauer-Emmett-Teller area was measured by nitrogen physisorption (Autosorb-iQ2, Quantachrome, America). Chemical valence analysis was performed by X-ray photoelectron spectroscopy (Escalab 250Xi, Thermo Scientific, America).

*Electrochemical Measurements:* Electrochemical activity was evaluated in a three-

electrode system in 1 M KOH aqueous solution by a CHI660e electrochemical workstation. The Ni foam loaded with as-prepared catalyst was used as the working electrode, a Pt wire electrode was used as the counter electrode, and an Ag/AgCl (3 M KCl) electrode was used as the reference electrode. All the potentials in this work were normalized to RHE according to the Nernst equation:  $E(\text{RHE}) = E(\text{Ag/AgCl}) + 0.059 \times \text{pH} + 0.198$ . The HER polarization activity was measured by linear sweep voltammetry (LSV) at the scan rate of  $5 \text{ mV s}^{-1}$ . The series resistance ( $R_s$ ) values for iR correction were calculated using the results of electrochemical impedance spectroscopy (EIS) measurement. The EIS measurement was operated in the frequency range of 0.01 to  $10^6 \text{ Hz}$  at  $-0.057 \text{ V}$  (vs RHE). I-t curve measurement was performed at a constant voltage of  $-0.102 \text{ V}$  (vs RHE). The electrochemical active surface area (ECSA) was revealed by the electrochemical double-layer capacitance ( $C_{dl}$ ) obtained from the cyclic voltammetry (CV) curves which were measured at different scan rates (20, 40, 80, 120, 160 and  $200 \text{ mV s}^{-1}$ ) at the non-Faradaic region (0.30 to  $0.40 \text{ V}$  vs RHE).

*Photovoltaic-Water Splitting Application:* The photovoltaic-electrocatalytic water splitting reaction was conducted in a water splitting reactor which was connected to a closed gas-circulation system (OLPCRS-3, Shanghai Boyi Scientific Instrument Co., China). The water splitting reaction was performed in 1 M KOH solution with the distance of 1 cm between the anode ( $\text{IrO}_2/\text{NF}$ ) and cathode ( $\text{CoMoCH@NiCoP/NF}$ ). The energy input was accomplished by a solar simulator (XES-50S1-RY, San-Ei Electric Co., Japan). The illumination area of the silicon film solar cell was optimized and the final energy input power was about 412 mW. The yields of  $\text{H}_2$  and  $\text{O}_2$  were detected by online gas chromatography (GC-2014C, Shimadzu Corp., Japan). The amount of  $\text{H}_2$  was used to calculate the solar-to-hydrogen conversion efficiency ( $\eta_{\text{STH}}$ ) for every hour through the following equal:

$$\eta_{\text{STH}} = \frac{\text{standard molar enthalpy of combustion (kJ mol}^{-1}\text{)} \times \text{H}_2 \text{ moles (mol)}}{\text{illumination power (W)} \times \text{time (s)}}$$

where the illumination power was measured by an optical power meter (PM 100D, Thorlabs, America), the range of measurement is 190 ~ 20000 nm, the energy of  $\text{H}_2$  equals to the standard molar enthalpy of combustion ( $-285 \text{ kJ mol}^{-1}$ ).

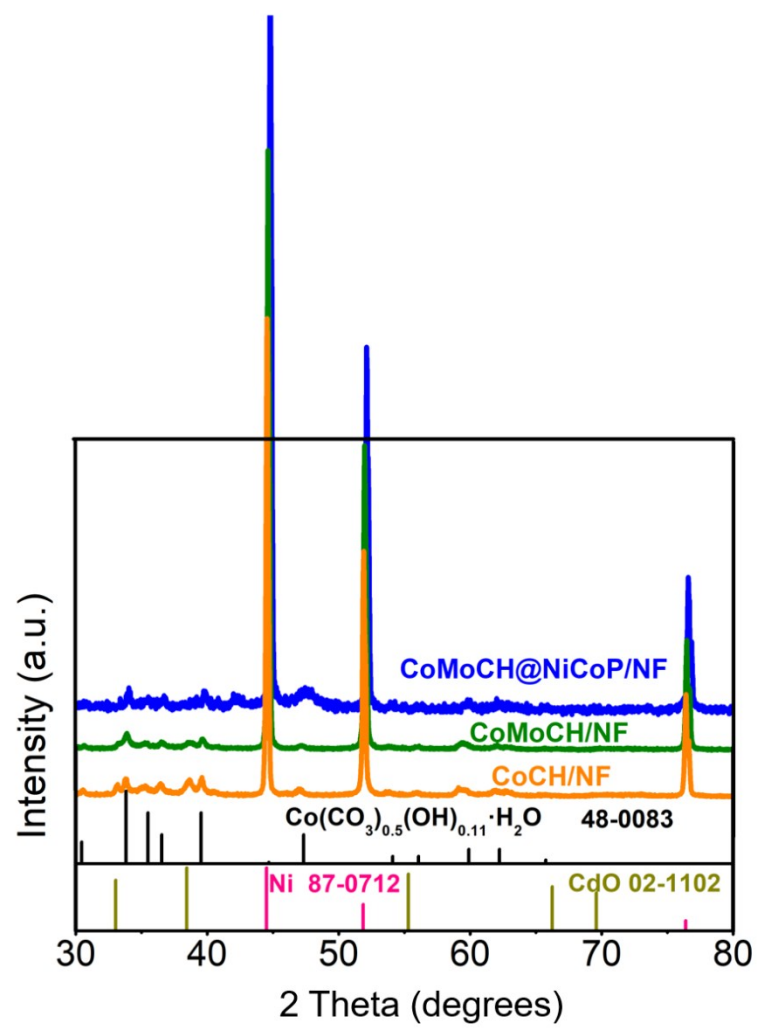

**Fig. S1.** Full XRD patterns of the samples.

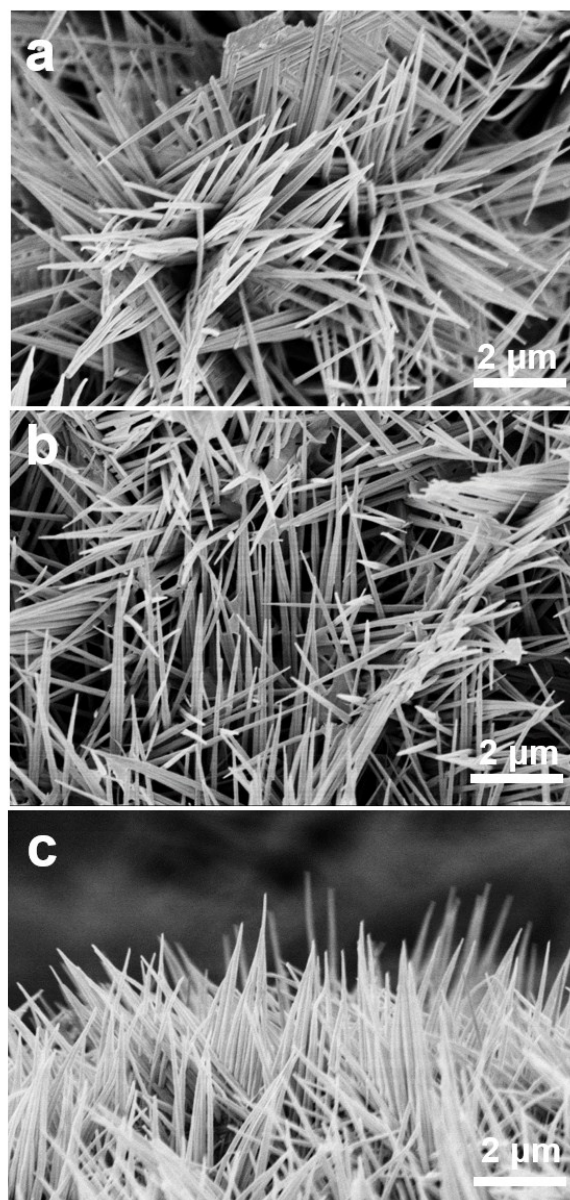

**Fig. S2.** SEM images of (a) CoCH/NF, (b) CoMoCH/NF and (c) CoCH@NiCoP/NF.

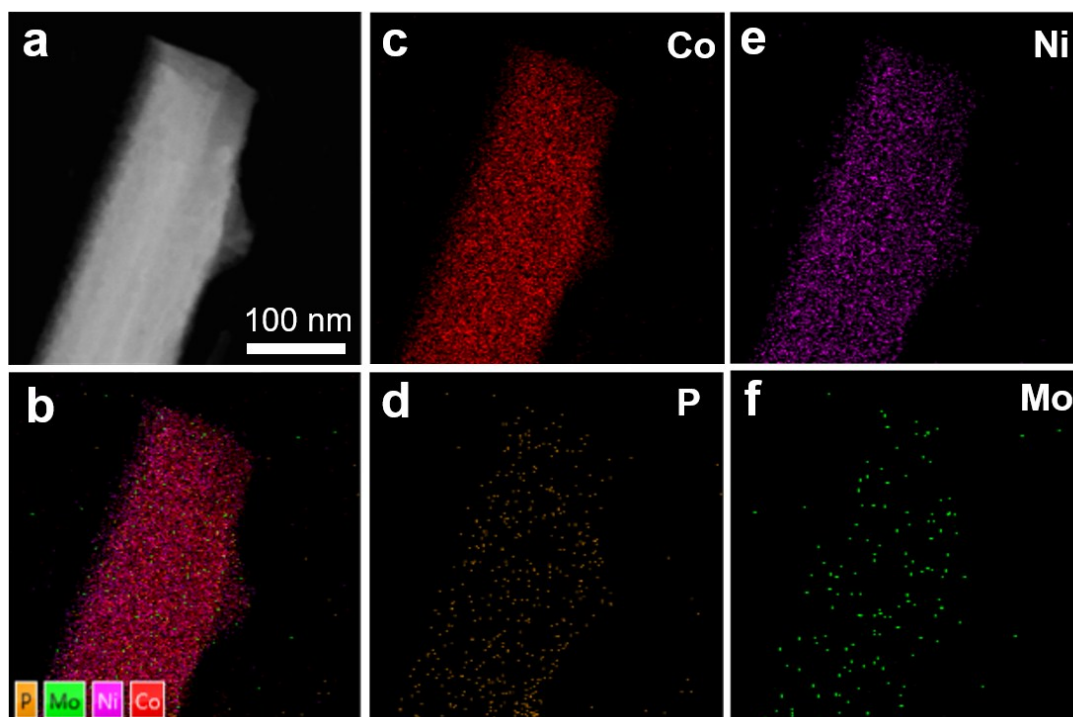

**Fig. S3.** (a) HAADF-STEM image, (b) combined element mapping image and (c-f) element mapping images of Co, P, Ni and Mo for the CoMoCH@NiCoP microwire.

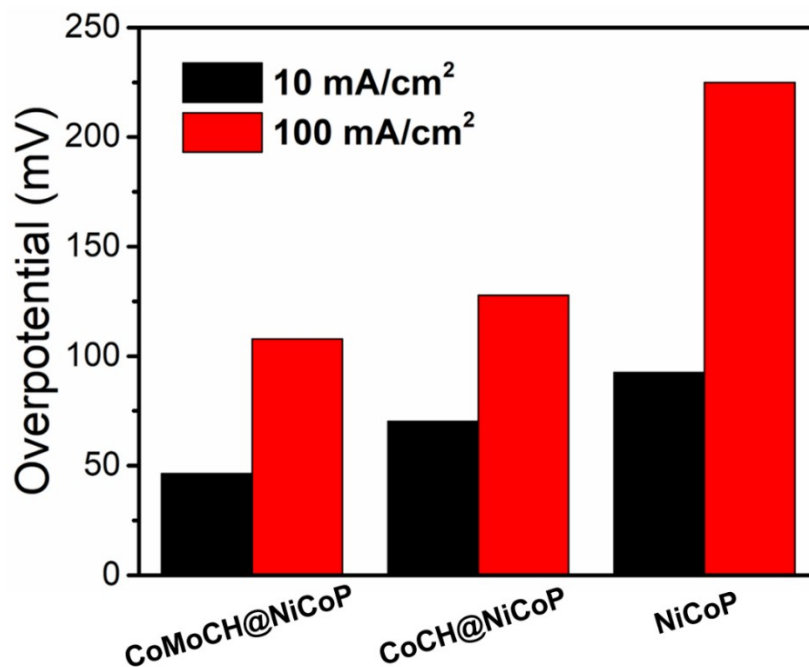

**Fig. S4.** Overpotentials obtained from HER polarization curves at the current density of 10 and 100 mA cm<sup>-2</sup>.

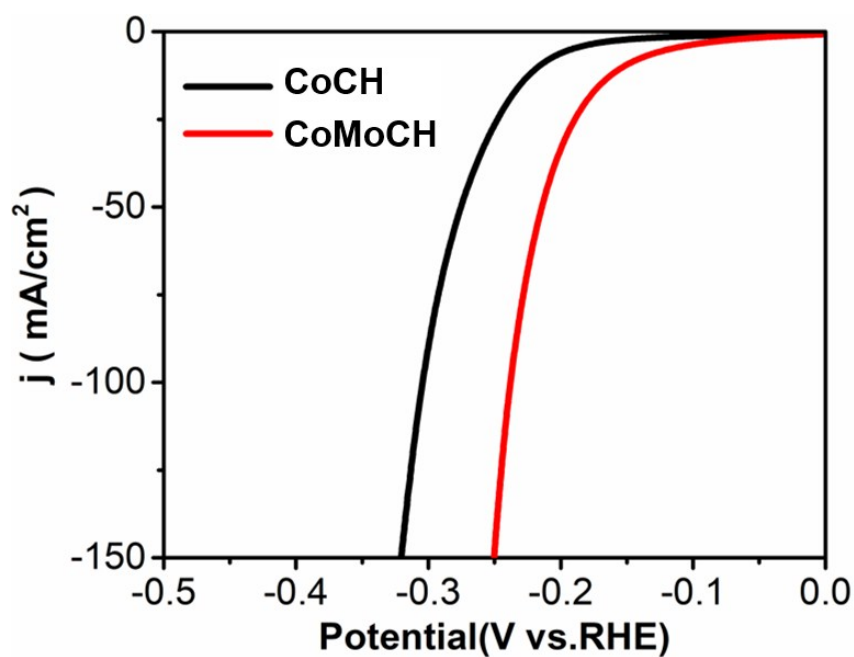

**Fig. S5.** LSV polarization curves of CoMoCH/NF and CoCH/NF electrodes.

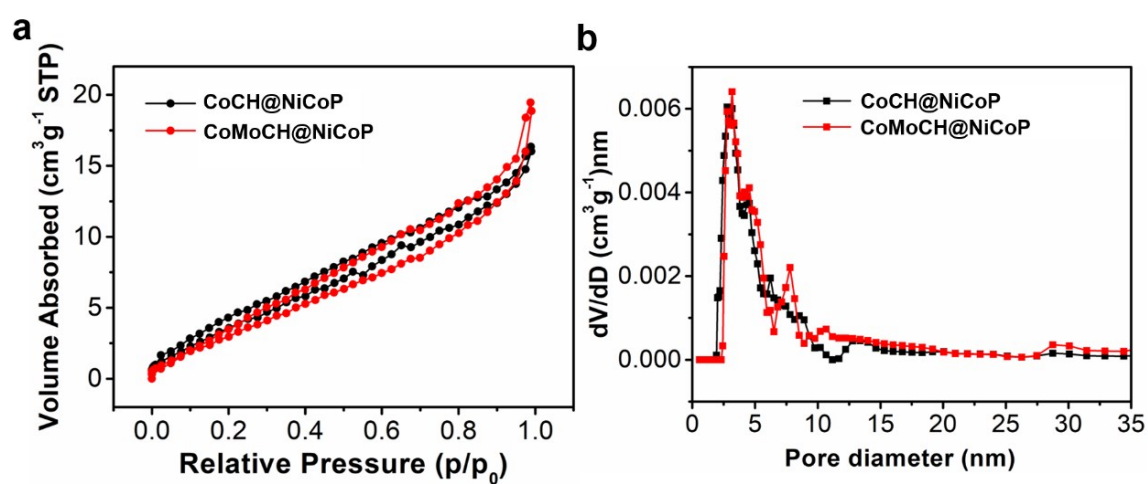

**Fig. S6.** (a) N<sub>2</sub> adsorption-desorption isotherms and (b) pore size distributions of the CoMoCH@NiCoP and CoCH@NiCoP catalysts.

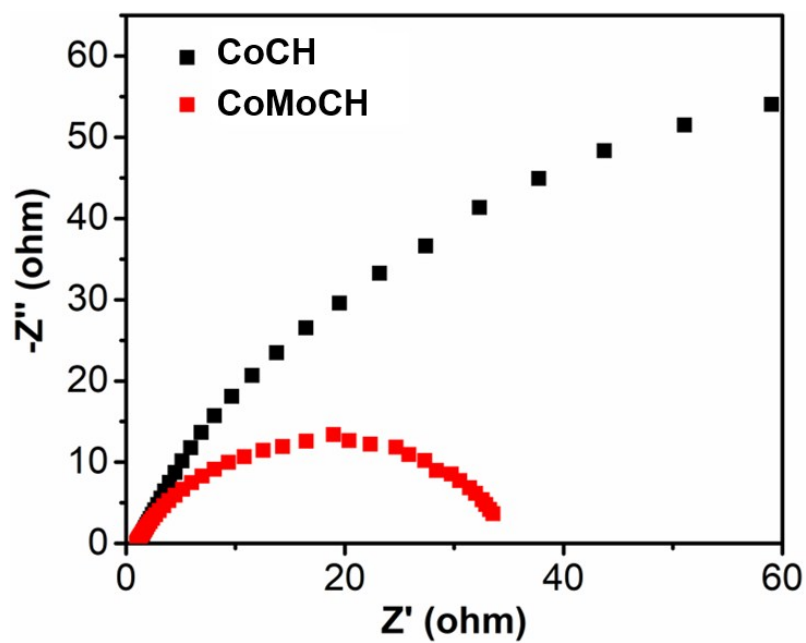

**Fig. S7.** Electrochemical impedance spectra measured at  $-0.06$  V vs RHE for the CoMoCH/NF and CoCH/NF electrodes.

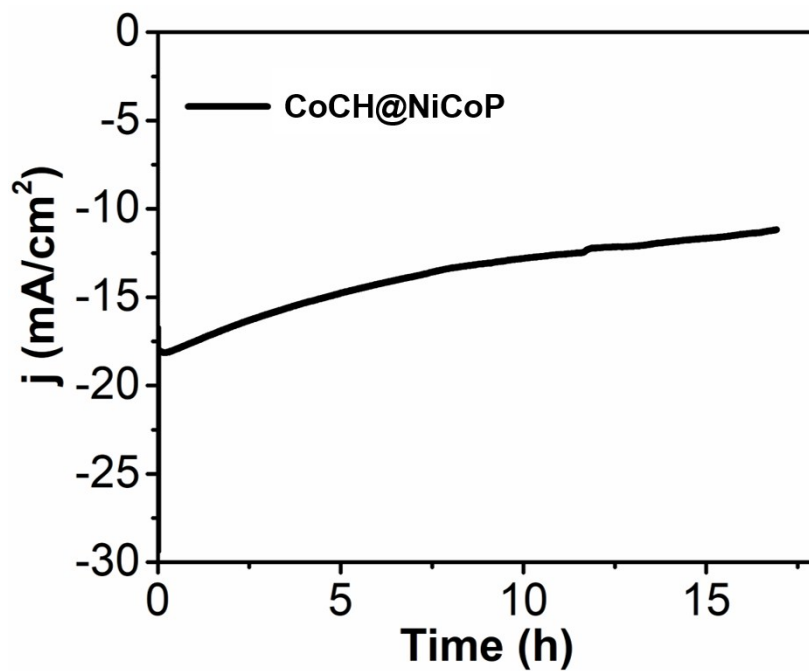

**Fig. S8.** Time-dependent current density curve for the CoCH@NiCoP/NF electrode.

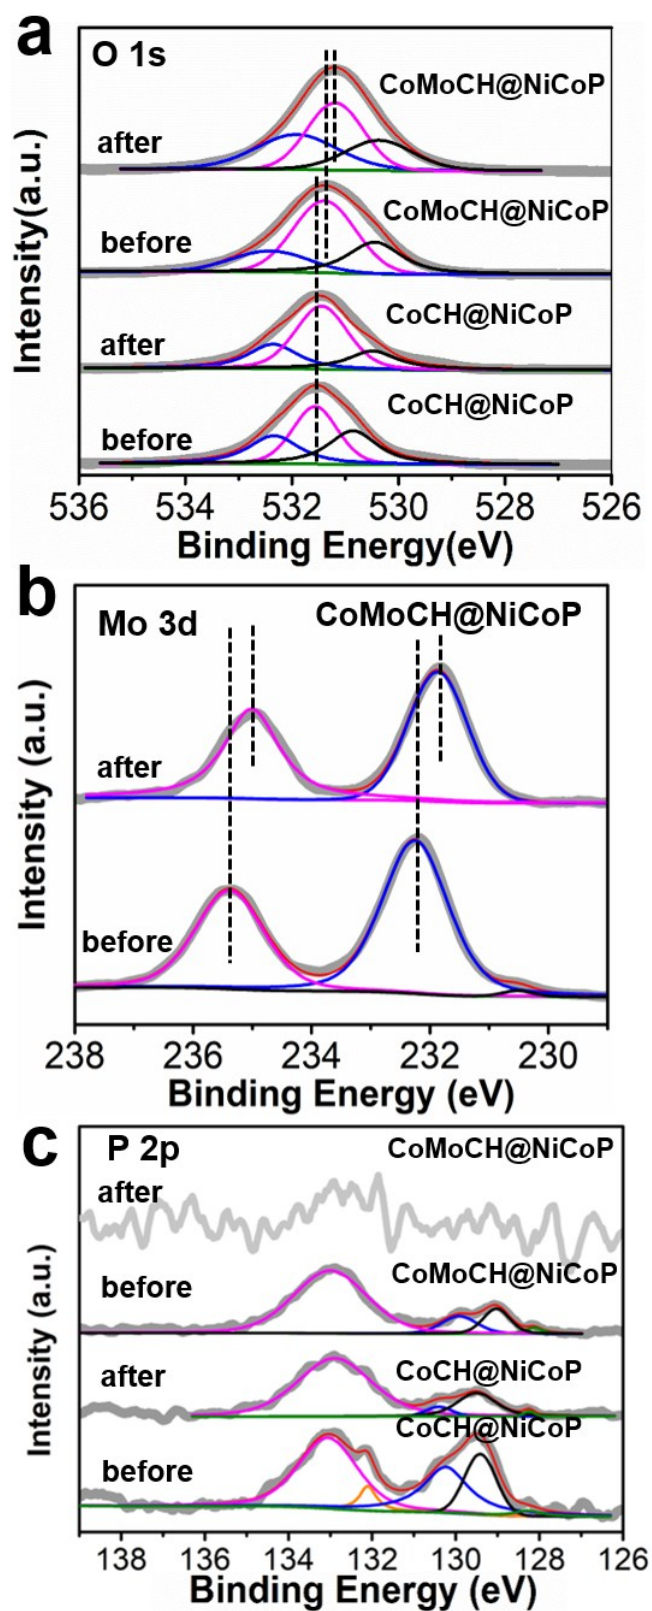

**Fig. S9.** XPS spectra of the (a) O 1s, (b) Mo 3d and (c) P 2p levels for the samples (before and after HER).

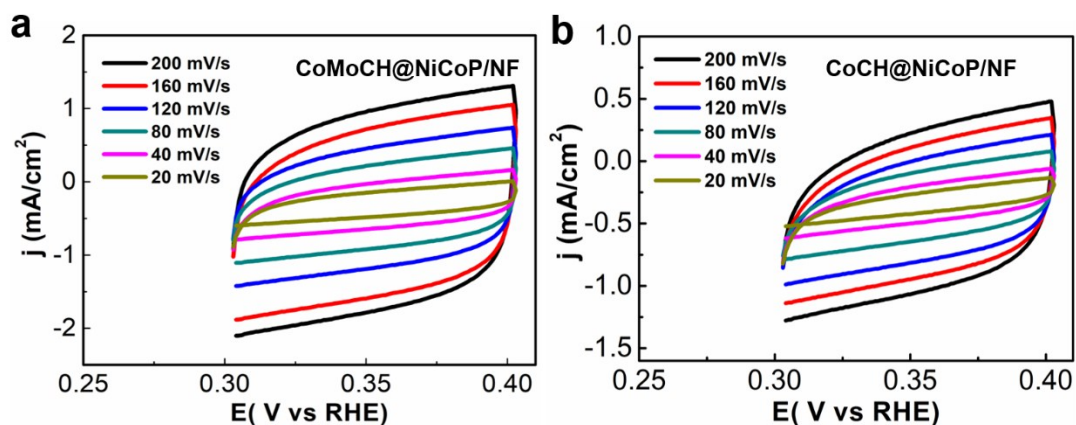

**Fig. S10.** CV curves of the (a) CoMoCH@NiCoP/NF and (b) CoCH@NiCoP/NF with various scan rates (20 ~ 200 mV s<sup>-1</sup>) in the potential range of 0.30 ~ 0.40 V vs RHE.

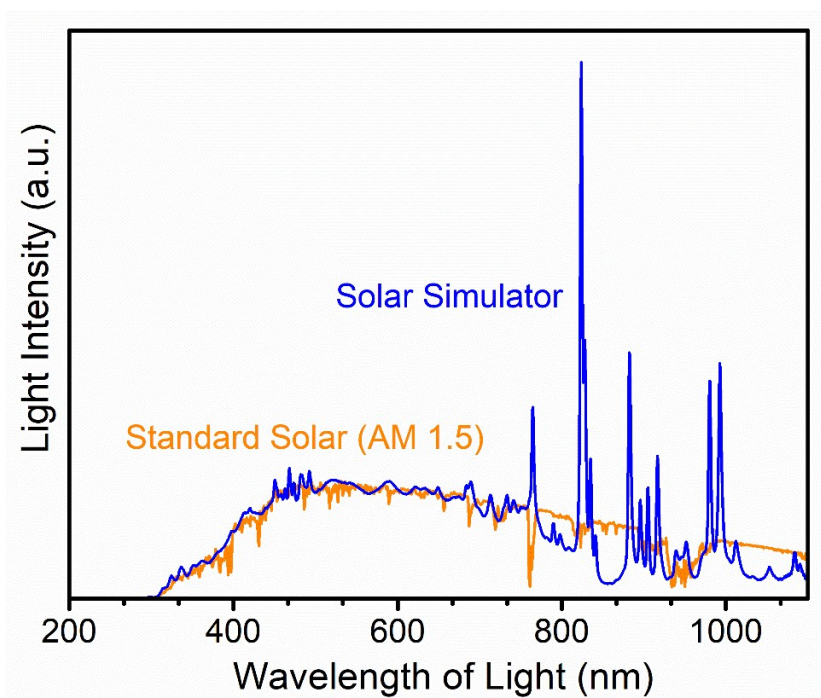

**Fig. S11.** The spectra of the input simulated sunlight and the standard AM 1.5 irradiation.

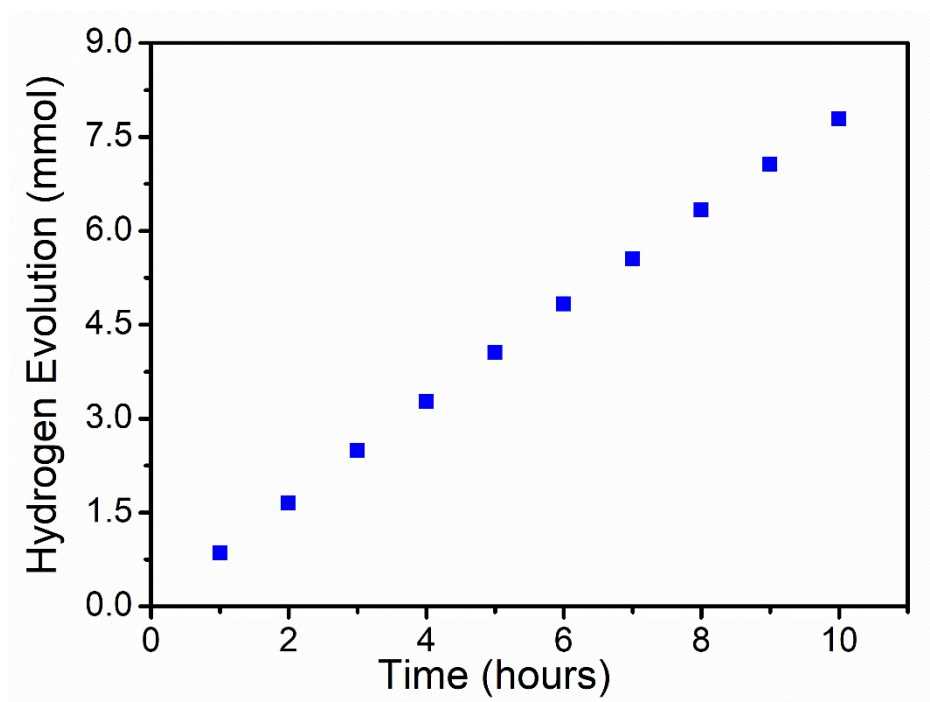

**Fig. S12.** The amount of  $\text{H}_2$  evolution for the photovoltaic-water splitting device during the test lasted for 10 h.

**Table S1.** Element compositions of the CoMoCH@NiCoP/NF from XPS data.

| Element | Peak BE | Height CPS | Atomic % |
|---------|---------|------------|----------|
| C 1s    | 284.79  | 15478.56   | 17.54    |
| Co 2p   | 781.42  | 71341.47   | 13.76    |
| O 1s    | 531.33  | 194691.82  | 56.02    |
| Mo 3d   | 232.21  | 32352.67   | 2.53     |
| Ni 2p   | 856.29  | 47358.87   | 7.98     |
| P 2p    | 132.95  | 3095.85    | 2.17     |

**Table S2.** HER performance for the CoMoCH@NiCoP/NF electrode and the state-of-art electrocatalysts.

| Catalyst                                             | Morphology              | Support       | Electrolyte                          | $\eta$ (mV) | $j$ (mA cm <sup>-2</sup> ) | Reference |
|------------------------------------------------------|-------------------------|---------------|--------------------------------------|-------------|----------------------------|-----------|
| NCP@MoCoCH                                           | Nanowire array          | Ni foam       | 1.0 M KOH                            | 45 mV       | 10                         | This work |
| Pt/C                                                 | -                       | -             | 0.5 M H <sub>2</sub> SO <sub>4</sub> | 25 mV       | 10                         | 1         |
|                                                      |                         |               | 1.0 M KOH                            | 43 mV       |                            |           |
| CoMoO <sub>4</sub>                                   | Nanowire array          | Ti mesh       | 1.0 M KOH                            | 81 mV       | 10                         | 2         |
| Co-Mo-B                                              | amorphous film          | Ti mesh       | 1.0 M KOH                            | 110 mV      | 20                         | 3         |
| NiCoMo film                                          | 3D dendritic structures | Ti sheet      | 0.5 M H <sub>2</sub> SO <sub>4</sub> | 35 mV       | 10                         | 4         |
|                                                      |                         |               | 0.1 M KOH                            | 132 mV      |                            |           |
| Co-Mo/Ti                                             | Nanoparticles           | Ti foil       | 1.0 M KOH                            | 75 mV       | 10                         | 5         |
| Mo-Fe (1/1)-Se                                       | Nanosheet               | Carbon paper  | 0.5 M H <sub>2</sub> SO <sub>4</sub> | 86.9 mV     | 10                         | 6         |
| N, P-Mo <sub>x</sub> C                               | Nanofibers              | Ni foam       | 1.0 M KOH                            | 107 mV      | 10                         | 7         |
|                                                      |                         |               | 0.5 M H <sub>2</sub> SO <sub>4</sub> | 135 mV      |                            |           |
| Mo <sub>x</sub> C-Ni@NCV                             | Nanoparticles           | Glassy carbon | 0.5 M H <sub>2</sub> SO <sub>4</sub> | 68 mV       | 10                         | 8         |
| MoO <sub>x</sub> /Ni <sub>3</sub> S <sub>2</sub> /NF | Hollow microspheres     | Ni foam       | 1.0 M KOH                            | 106 mV      | 10                         | 9         |

|                                                         |                   |               |                                      |         |    |    |
|---------------------------------------------------------|-------------------|---------------|--------------------------------------|---------|----|----|
| MoS <sub>2</sub> /NiS/MoO <sub>3</sub>                  | Nanowire          | Ti foil       | 1.0 M KOH                            | 91 mV   | 10 | 10 |
| CoP                                                     | Nanoneedle arrays | Carbon cloth  | 1.0 M KOH                            | 95 mV   | 10 | 11 |
| Co/Co <sub>3</sub> O <sub>4</sub>                       | Nanosheets        | Ni foam       | 1.0 M KOH                            | 90 mV   | 10 | 12 |
| MoP sheets                                              | Nanosheet         | Glassy carbon | 0.5 M H <sub>2</sub> SO <sub>4</sub> | 172 mV  | 10 | 13 |
| Ni-C-N NSs                                              | Nanosheets        | Glassy carbon | 0.5 M H <sub>2</sub> SO <sub>4</sub> | 60.9 mV | 10 | 14 |
|                                                         |                   |               | 1.0 M KOH                            | 30.8 mV |    |    |
|                                                         |                   |               | 1.0 M PBS                            | 92.1 mV |    |    |
| FeP <sub>2</sub>                                        | Nanowire array    | Fe foil       | 1.0 M KOH                            | 189 mV  | 10 | 15 |
|                                                         |                   |               | 0.5 M H <sub>2</sub> SO <sub>4</sub> | 61 mV   |    |    |
| Co-P                                                    | Nanophere arrays  | FTO           | 1.0 M KOH                            | 125 mV  | 10 | 16 |
| Co-P                                                    | Foam structure    | Copper sheet  | 0.5 M H <sub>2</sub> SO <sub>4</sub> | 50 mV   | 10 | 17 |
|                                                         |                   |               | 1.0 M KOH                            | 131 mV  |    |    |
| Co <sub>59</sub> -P <sub>20</sub> -B <sub>21</sub>      | amorphous         | Carbon paper  | 0.5 M H <sub>2</sub> SO <sub>4</sub> | 172 mV  | 10 | 18 |
| Fe <sub>10</sub> -Co <sub>40</sub> -Ni <sub>40</sub> -P | Nanosheet arrays  | Ni foam       | 1.0 M KOH                            | 68 mV   | 10 | 19 |
| Fe <sub>0.5</sub> Co <sub>0.5</sub> P                   | Nanowire array    | Carbon cloth  | 0.5 M H <sub>2</sub> SO <sub>4</sub> | 37 mV   | 10 | 20 |

|                                            |                  |               |                                      |        |    |    |
|--------------------------------------------|------------------|---------------|--------------------------------------|--------|----|----|
| NiSe <sub>2</sub> NTAS                     | Nanotube arrays  | Ni foam       | 1.0 M KOH                            | 60 mV  | 10 | 21 |
|                                            |                  |               | 0.5 M H <sub>2</sub> SO <sub>4</sub> | 98 mV  |    |    |
| CC@N-CoP                                   | Nanowire array   | Carbon cloth  | 0.5 M H <sub>2</sub> SO <sub>4</sub> | 42 mV  | 10 | 22 |
| PANI/CoP<br>HNWs-CFs                       | nanowires        | Carbon fibers | 0.5 M H <sub>2</sub> SO <sub>4</sub> | 57 mV  | 10 | 23 |
| (Ni.Co) <sub>0.85</sub> Se                 | Nanosheet arrays | Ni foam       | 1.0 M KOH                            | 169 mV | 10 | 24 |
| Ni <sub>x</sub> P/NF-20                    | nanospheres      | Ni foam       | 1.0 M KOH                            | 63 mV  | 10 | 25 |
| Ni <sub>3</sub> N@CQDs                     | Nanosheet        | Glassy carbon | 1.0 M KOH                            | 69 mV  | 10 | 26 |
| FeP/C with shell                           | nanoparticles    | Glassy carbon | 0.5 M H <sub>2</sub> SO <sub>4</sub> | 71 mV  | 10 | 27 |
| Zn <sub>0.08</sub> Co <sub>0.92</sub> P/TM | Nanowall array   | Ti mesh       | 1.0 M KOH                            | 67 mV  | 10 | 28 |
|                                            |                  |               | 0.5 M H <sub>2</sub> SO <sub>4</sub> | 39 mV  |    |    |
| Mn-Ni <sub>2</sub> P/NF                    | Nanosheet array  | Ni foam       | 1.0 M KOH                            | 103 mV | 20 | 29 |
| Al-CoP/CC                                  | nanoarray        | Carbon cloth  | 0.5 M H <sub>2</sub> SO <sub>4</sub> | 23 mV  | 10 | 30 |
| Al-Ni <sub>2</sub> P                       | Nanosheet array  | Ti mesh       | 1.0 M KOH                            | 129 mV | 10 | 31 |

---

## Reference

1. B. Liu, L. Huo, Z. Gao, G. Zhi, G. Zhang and J. Zhang, *Small*, 2017, **13**, 1700092.

2. J. Zhao, X. Ren, H. Ma, X. Sun, Y. Zhang, T. Yan, Q. Wei and D. Wu, *ACS Sustain. Chem. Eng.*, 2017, **5**, 10093-10098.
3. Z. Sun, S. Hao, X. Ji, X. Zheng, J. Xie, X. Li and B. Tang, *Dalton T.*, 2018, **47**, 7640-7643.
4. D. Gao, J. Guo, X. Cui, L. Yang, Y. Yang, H. He, P. Xiao and Y. Zhang, *ACS Appl. Mater. Interfaces*, 2017, **9**, 22420-22431.
5. J. M. McEnaney, T. L. Soucy, J. M. Hodges, J. F. Callejas, J. S. Mondschein and R. E. Schaak, *J. Mater. Chem. A*, 2016, **4**, 3077-3081.
6. Y. Chen, J. Zhang, P. Guo, H. Liu, Z. Wang, M. Liu, T. Zhang, S. Wang, Y. Zhou, X. Lu and J. Zhang, *ACS Appl. Mater. Interfaces*, 2018, **10**, 27787-27794.
7. L. Ji, J. Wang, X. Teng, H. Dong, X. He and Z. Chen, *ACS Appl. Mater. Interfaces*, 2018, **10**, 14632-14640.
8. S. Wang, J. Wang, M. Zhu, X. Bao, B. Xiao, D. Su, H. Li and Y. Wang, *J. Am. Chem. Soc.*, 2015, **137**, 15753-15759.
9. Y. Wu, G.-D. Li, Y. Liu, L. Yang, X. Lian, T. Asefa and X. Zou, *Adv. Funct. Mater.*, 2016, **26**, 4839-4847.
10. C. Wang, B. Tian, M. Wu and J. Wang, *ACS Appl. Mater. Interfaces*, 2017, **9**, 7084-7090.
11. P. Wang, F. Song, R. Amal, Y. H. Ng and X. Hu, *ChemSusChem*, 2016, **9**, 472-477.
12. X. Yan, L. Tian, M. He and X. Chen, *Nano Lett.*, 2015, **15**, 6015-6021.
13. J. Jia, W. Zhou, G. Li, L. Yang, Z. Wei, L. Cao, Y. Wu, K. Zhou and S. Chen, *ACS Appl. Mater. Interfaces*, 2017, **9**, 8041-8046.
14. J. Yin, Q. Fan, Y. Li, F. Cheng, P. Zhou, P. Xi and S. Sun, *J. Am. Chem. Soc.*, 2016, **138**, 14546-14549.
15. C. Y. Son, I. H. Kwak, Y. R. Lim and J. Park, *Chem. Commun.*, 2016, **52**, 2819-2822.
16. G.-Q. Han, X. Li, Y.-R. Liu, B. Dong, W.-H. Hu, X. Shang, X. Zhao, Y.-M. Chai, Y.-Q. Liu and C.-G. Liu, *RSC Adv.*, 2016, **6**, 52761-52771.
17. S. Oh, H. Kim, Y. Kwon, M. Kim, E. Cho and H. Kwon, *J. Mater. Chem. A*, 2016, **4**, 18272-18277.
18. J. Kim, H. Kim, S.-K. Kim and S. H. Ahn, *J. Mater. Chem. A*, 2018, **6**, 6282-6288.
19. Z. Zhang, J. Hao, W. Yang and J. Tang, *RSC Adv.*, 2016, **6**, 9647-9655.
20. C. Tang, L. Gan, R. Zhang, W. Lu, X. Jiang, A. M. Asiri, X. Sun, J. Wang and L. Chen, *Nano Lett.*, 2016, **16**, 6617-6621.
21. X. Teng, J. Wang, L. Ji, Y. Lv and Z. Chen, *Nanoscale*, 2018, **10**, 9276-9285.
22. Q. Zhou, Z. Shen, C. Zhu, J. Li, Z. Ding, P. Wang, F. Pan, Z. Zhang, H. Ma, S. Wang and H. Zhang, *Adv. Mater.*, 2018, **30**, e1800140.
23. J. X. Feng, S. Y. Tong, Y. X. Tong and G. R. Li, *J. Am. Chem. Soc.*, 2018, **140**, 5118-5126.
24. K. Xiao, L. Zhou, M. Shao and M. Wei, *J. Mater. Chem. A*, 2018, **6**, 7585-7591.
25. X. Cao, D. Jia, D. Li, L. Cui and J. Liu, *Chem. Eng. J.*, 2018, **348**, 310-318.
26. M. Zhou, Q. Weng, Z. I. Popov, Y. Yang, L. Y. Antipina, P. B. Sorokin, X. Wang, Y. Bando and D. Golberg, *ACS Nano*, 2018, **12**, 4148-4155.
27. D. Y. Chung, S. W. Jun, G. Yoon, H. Kim, J. M. Yoo, K. S. Lee, T. Kim, H. Shin, A. K. Sinha, S. G. Kwon, K. Kang, T. Hyeon and Y. E. Sung, *J. Am. Chem. Soc.*, 2017, **139**, 6669-6674.
28. T. Liu, D. Liu, F. Qu, D. Wang, L. Zhang, R. Ge, S. Hao, Y. Ma, G. Du, A. M. Asiri, L. Chen and X. Sun, *Adv. Energy Mater.*, 2017, **7**.
29. Y. Zhang, Y. Liu, M. Ma, X. Ren, Z. Liu, G. Du, A. M. Asiri and X. Sun, *Chem. Commun.*,

2017, **53**, 11048-11051.

30. Z. Xiong, Z. Lei, C.-C. Kuang, X. Chen, B. Gong, Y. Zhao, J. Zhang, C. Zheng and J. C. S. Wu, *Applied Catalysis B-Environmental*, 2017, **202**, 695-703.
31. H. Du, L. Xia, S. Zhu, F. Qu and F. Qu, *Chem Commun (Camb)*, 2018, **54**, 2894-2897.
